# Supplementary material for: Nitric oxide maintains cell survival of Trichomonas vaginalis upon iron depletion
Source: PubMed Central journal article supplement (PMC4513698; doi:10.1186/s13071-015-1000-5), 2015-07-25
Supplement: 13071_2015_1000_MOESM1_ESM.pdf [file 13071_2015_1000_MOESM1_ESM.pdf]

### Additional file 1. Primer sets for quantitative RT-PCR

| Oligo Name            | Sequence                      |
|-----------------------|-------------------------------|
| SOD-F (TVAG_039980)   | TTAACACAGCACGCTGTCTGAG        |
| SOD-R (TVAG_039980)   | AACATCAACCTTTTCTGGTGT         |
| SOD-F (TVAG_120340)   | CCTTACACAGCATGCTGTTGAGA       |
| SOD-R (TVAG_120340)   | CTCGACAGAGCCGAATTCCTTTGT      |
| Rbr-F (TVAG_064490)   | GAAGTTGCCAAGAAGCAAGG          |
| Rbr-R (TVAG_064490)   | CAGCAACATCAGCGAAGTGT          |
| Rbr-F (TVAG_275660)   | GAAGTCGCCAAGAAACAAGG          |
| Rbr-R (TVAG_275660)   | TTCACCAGCTGCAGCATTAC          |
| TrxP-F (TVAG_455310)  | ACTTGGGTGCGAGGTTCTTGGC        |
| TrxP-R (TVAG_455310)  | TTGGACATGACGAATTATTCCTTGA     |
| TrxP-F (TVAG_114310)  | GCGCTAAGATCGCTAAGGAA          |
| TrxP-R (TVAG_114310)  | AGCGAACTGGTAAGCCTTGA          |
| CMD1-F (TVAG_256720)  | GAGTTACAAAGCGACGGA            |
| CMD1-R (TVAG_256720)  | TCCAAAGACATTTCTAAAATGATT      |
| CMD2-F (TVAG_107080)  | TTAGGTCATGGAAAATGGGA          |
| CMD2-R (TVAG_107080)  | CATTCCTTAGCAAATTTCA           |
| HCP-F (TVAG_336320)   | CAG TGC AAT GAC TCA TAC TCC C |
| HCP-R (TVAG_336320)   | CCTTGATGCCGAAGTTCTTGA         |
| RCMNS-F (TVAG_167830) | AGCCAGAAGTCAAATGGTATC         |
| RCMNS-R (TVAG_167830) | TCTAGGTCATTGAGAGAGTTGAG       |

SOD, superoxide dismutase; Rbr, rubrerythrin; TrxP, thioredoxin peroxidase; CMD, 4- carboxymuconolactone decarboxylase; HCP, hybrid cluster protein or hydroxylamine reductase; RCMNS, regulator of cell morphogenesis and NO signaling.
