# Supplementary material for: Nitric oxide maintains cell survival of Trichomonas vaginalis upon iron depletion
Source: PubMed Central journal article supplement (PMC4513698; doi:10.1186/s13071-015-1000-5), 2015-07-25
Supplement: 13071_2015_1000_MOESM3_ESM.pdf [file 13071_2015_1000_MOESM3_ESM.pdf]

### Additional file 3. Summary of NGS analysis

| <b>Sample type</b>    | <b>Total reads</b> | <b>Reads mapped to the<br/>reference genome</b> | <b>Read length</b> | <b>Number of<br/>mapped genes</b> | <b>Mapped %</b> |
|-----------------------|--------------------|-------------------------------------------------|--------------------|-----------------------------------|-----------------|
| <b>IR<sup>a</sup></b> | <b>51,519,438</b>  | <b>45,416,972</b>                               | <b>100</b>         | <b>28,256</b>                     | <b>95.61</b>    |
| <b>ID<sup>b</sup></b> | <b>53,444,250</b>  | <b>44,573,700</b>                               | <b>100</b>         | <b>33,976</b>                     | <b>93.01</b>    |

<sup>a</sup> IR, iron-rich.

<sup>b</sup> ID, iron-deficient.

This table represents the depth and length of the experimental groups, the accuracy as

well.
