# Supplementary material for: Nitric oxide maintains cell survival of Trichomonas vaginalis upon iron depletion
Source: PubMed Central journal article supplement (PMC4513698; doi:10.1186/s13071-015-1000-5), 2015-07-25
Supplement: 13071_2015_1000_MOESM4_ESM.pdf [file 13071_2015_1000_MOESM4_ESM.pdf]

**Additional file 4. Iron-dependent expression of antioxidants in *T. vaginalis*.**

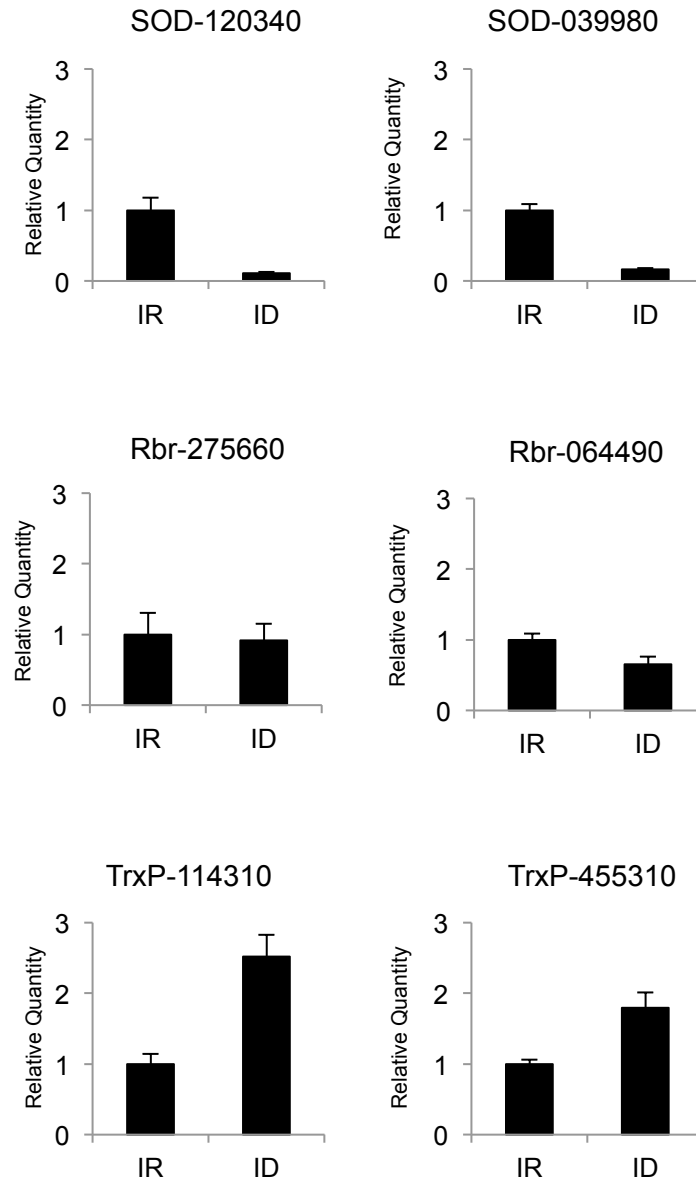

The expression levels of antioxidants in cells cultured under different iron concentrations were determined by using quantitative RT-PCR. IR, iron rich (80  $\mu$ M FAC); ID, iron deficiency (180  $\mu$ M DIP). SOD, superoxide dismutase; Rbr, rubrerythrin; TrxP, thioredoxin peroxidase. The data are compared with ribosomal protein L8 for the final adjustment.
