# Supplementary material for: Nitric oxide maintains cell survival of Trichomonas vaginalis upon iron depletion
Source: PubMed Central journal article supplement (PMC4513698; doi:10.1186/s13071-015-1000-5), 2015-07-25
Supplement: 13071_2015_1000_MOESM5_ESM.pdf [file 13071_2015_1000_MOESM5_ESM.pdf]

## Additional file 5. Validation of NO-related genes identified from transcriptomics

analysis.

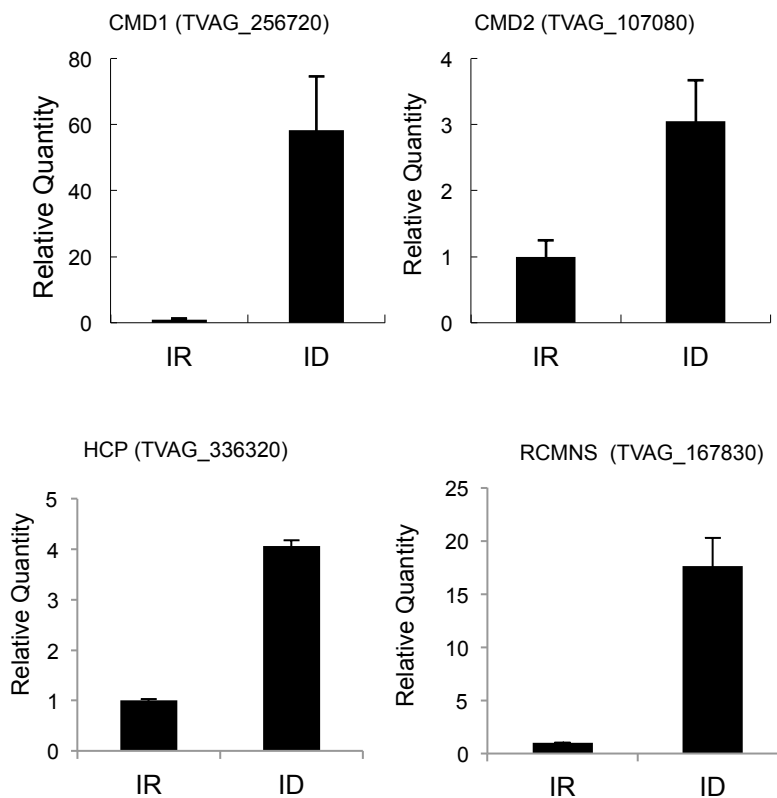

The expression levels of iron deficiency-induced genes were verified by using quantitative RT-PCR. IR, iron rich (80  $\mu$ M FAC); ID, iron deficiency (180  $\mu$ M DIP). CMD, 4-carboxymuconolactone decarboxylase; HCP, hybrid cluster protein or hydroxylamine reductase; RCMNS, regulator of cell morphogenesis and NO signaling.
