# Supplementary material for: Nitric oxide maintains cell survival of Trichomonas vaginalis upon iron depletion
Source: PubMed Central journal article supplement (PMC4513698; doi:10.1186/s13071-015-1000-5), 2015-07-25
Supplement: 13071_2015_1000_MOESM6_ESM.pdf [file 13071_2015_1000_MOESM6_ESM.pdf]

**Additional file 6. NO levels in iron-deficient *T. vaginalis* treated with NOS and proteasome inhibitors.**

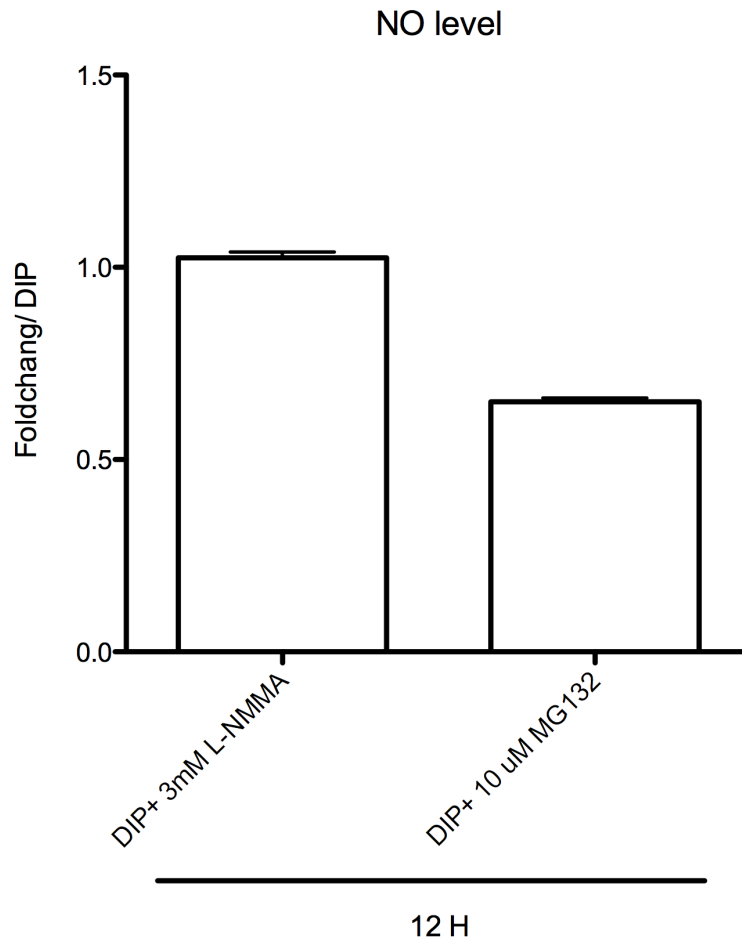

NO levels in iron-deficient cells treated with the NOS inhibitor (L-NMMA, 3 mM) and the proteasome inhibitor (MG132, 10  $\mu$ M) for 12 hours.
